# Supplementary material for: Transcriptome Analysis of Plasmodium falciparum Isolates From Benin Reveals Specific Gene Expression Associated With Cerebral Malaria
Source: PubMed Central journal article supplement — J Infect Dis. 2022 Mar 7;225(12):2187–96. doi: 10.1093/infdis/jiac086 (PMC9200161; doi:10.1093/infdis/jiac086), 2022-03-07
Supplement: jiac086_suppl_supplementary_data.pdf [file jiac086_suppl_supplementary_data.pdf]

## Supplemental data 1: RNA quality

| Sample | Nanodrop      |               | Bioanalyzer profil Pico Chip |     |
|--------|---------------|---------------|------------------------------|-----|
|        | Ratio 260/280 | Ratio 260/230 | rRNA Ratio<br>[28s/18s]      | RIN |
| 01-004 | 1.98          | 1.26          | 0.2                          | 7.6 |
| 01-006 | 2.25          | 2.3           | 1.8                          | 8.7 |
| 01-013 | 2.09          | 0.93          | N/A                          | 8.5 |
| 01-020 | 2.26          | 0.24          | N/A                          | 7.5 |
| 01-033 | 2.05          | 2.13          | 1.3                          | 7.1 |
| 02-002 | 2.24          | 2.24          | N/A                          | 6.9 |
| 02-003 | 1.89          | 0.9           | 1.2                          | 7.2 |
| 02-011 | 2.2           | 0.42          | 0.9                          | 8   |
| 02-013 | 2.19          | 1.96          | 1.3                          | 7.2 |
| 02-016 | 2.2           | 1.65          | 0.6                          | 6.6 |
| 02-017 | 2.22          | 2.32          | 1.7                          | 7.3 |
| 02-018 | 1.97          | 1.35          | 0.9                          | 9.6 |
| 02-025 | 2.2           | 1.66          | 1.1                          | 8.5 |
| 02-027 | 2.21          | 1.98          | 0.2                          | 7   |
| 02-030 | 2.19          | 1.66          | N/A                          | 8   |
| 02-034 | 2.22          | 1.79          | 0.8                          | 9   |
| 03-022 | 1.73          | 0.84          | 0.2                          | 6.6 |
| 03-025 | 2.22          | 2.09          | 1.1                          | 9   |
| 03-028 | 2.05          | 1.58          | 1.1                          | 6.9 |
| 03-030 | 2.04          | 0.97          | 1.0                          | 7.1 |
| 03-031 | 2.11          | 1.9           | 1.7                          | 7.4 |
| 03-037 | 2.16          | 2.34          | N/A                          | 7.1 |
| 03-051 | 1.82          | 1.13          | 0.7                          | 7.1 |
| 03-059 | 2.12          | 1.75          | 1.5                          | 9.7 |
| 03-060 | 2.09          | 1.68          | N/A                          | 7.3 |
| 03-075 | 2.09          | 0.69          | N/A                          | 7.1 |
| 03-108 | 2.02          | 1.54          | 1.0                          | 8.1 |
| 03-110 | 2.03          | 1.71          | N/A                          | 6.7 |
| 03-113 | 1.9           | 1.09          | 0.3                          | 7.4 |
| 03-127 | 1.97          | 1.09          | 0.6                          | 7   |
| 03-134 | 2.11          | 0.13          | 0.9                          | 6.8 |
| 03-137 | 1.91          | 0.15          | N/A                          | 6.9 |
| 03-140 | 2.26          | 2.47          | 1.6                          | 7.7 |
| 03-141 | 2.21          | 1.55          | 1.3                          | 9.7 |
| 03-145 | 1.8           | 0.75          | 1.5                          | 7.6 |
| 03-153 | 2.1           | 1.71          | 0.9                          | 9.8 |
| 03-160 | 2.09          | 1.27          | 3.0                          | 7.8 |



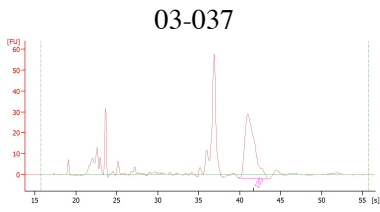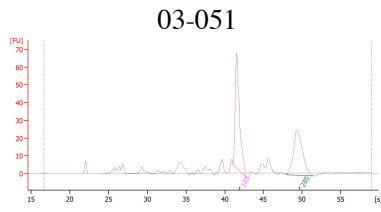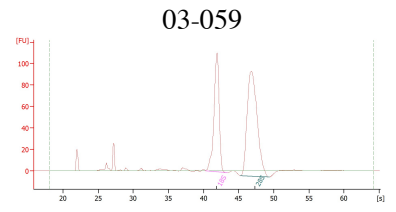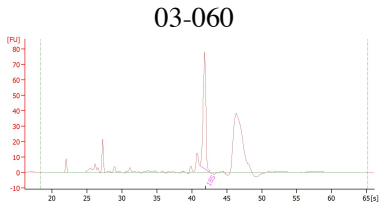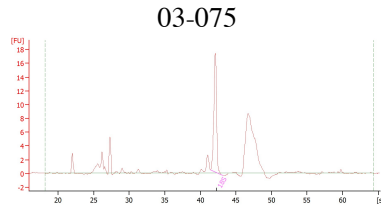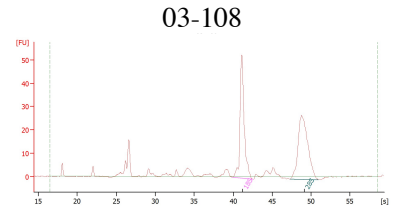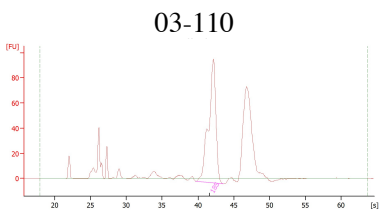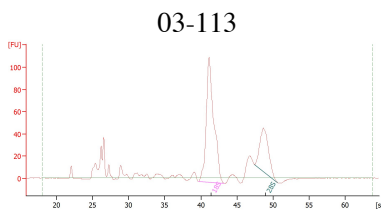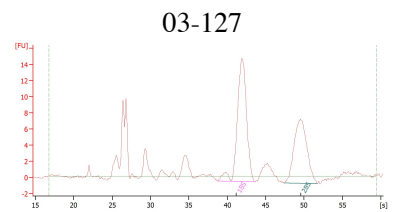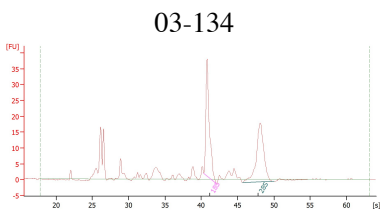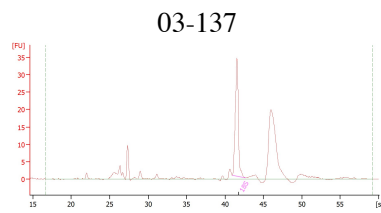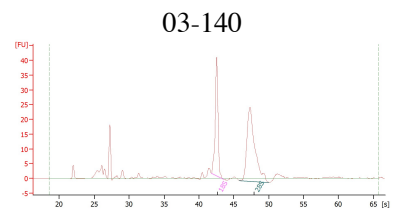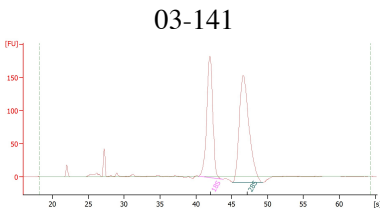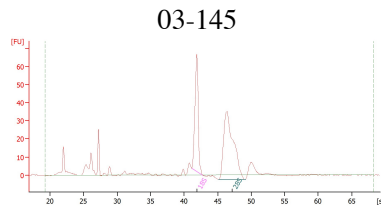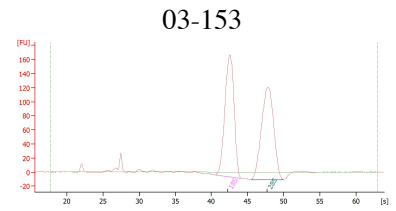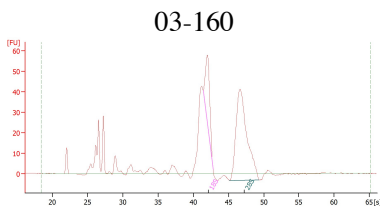

## Supplemental data 2: *var* ATS-2 primers

|                | Primers set                                                                                                                        | Vardom statistics | VarDB statistics  |
|----------------|------------------------------------------------------------------------------------------------------------------------------------|-------------------|-------------------|
| <b>Forward</b> | cccatccacaaccaactgga<br>ccaattatgaaccaattaga<br>cctatactcaatcaaataaa<br>cctataaccaatcaaataaa                                       | 47%<br>(106/226)  | 13%<br>(196/1517) |
| <b>Reverse</b> | agatagacatagaratatgtgyga<br>agatagacatagagatatgtcga<br>agatagacatagagatatgttga<br>agatagacatagaatatgttga<br>agatagacatagaatatgtcga | 68%<br>(154/226)  | 46%<br>(699/1517) |

### Supplemental data 3: Mapping statistics

\*PE reads aligned concordantly

| Sample | Total PE reads | Reads aligned on <i>P. falciparum</i> * | Reads aligned on human* | % aligned on <i>P. falciparum</i> | Included |
|--------|----------------|-----------------------------------------|-------------------------|-----------------------------------|----------|
| 01-004 | 29,460,649     | 25,013,688                              | 1,806,283               | 84.91                             | yes      |
| 01-006 | 30,339,991     | 22,362,568                              | 4,196,159               | 73.71                             | yes      |
| 01-013 | 19,726,822     | 15,530,598                              | 2,581,835               | 78.72                             | yes      |
| 01-020 | 24,824,089     | 22,115,932                              | 367,422                 | 89.09                             | yes      |
| 01-033 | 24,725,082     | 842,203                                 | 21,956,993              | 3.41                              | no       |
| 02-002 | 29,967,330     | 23,760,342                              | 3,414,561               | 79.29                             | yes      |
| 02-003 | 25,691,710     | 21,589,730                              | 1,440,628               | 84.03                             | yes      |
| 02-011 | 20,387,129     | 13,886,245                              | 3,629,496               | 68.11                             | yes      |
| 02-013 | 25,766,867     | 17,300,223                              | 6,317,238               | 67.14                             | yes      |
| 02-016 | 34,260,826     | 28,218,798                              | 2,673,820               | 82.36                             | yes      |
| 02-017 | 22,279,539     | 18,674,319                              | 1,598,497               | 83.82                             | yes      |
| 02-018 | 24,899,632     | 13,481,147                              | 9,448,237               | 54.14                             | yes      |
| 02-025 | 34,465,539     | 30,214,204                              | 552,149                 | 87.66                             | yes      |
| 02-027 | 21,078,309     | 17,703,933                              | 1,482,800               | 83.99                             | yes      |
| 02-030 | 18,863,558     | 14,905,305                              | 1,827,742               | 79.01                             | yes      |
| 02-034 | 40,413,108     | 30,939,185                              | 5,556,226               | 76.56                             | yes      |
| 03-022 | 22,443,761     | 11,821,917                              | 8,357,942               | 52.67                             | yes      |
| 03-025 | 22,891,522     | 19,206,253                              | 1,534,413               | 83.90                             | yes      |
| 03-028 | 26,474,232     | 2,327,672                               | 21,951,661              | 8.79                              | no       |
| 03-030 | 40,117,029     | 931,038                                 | 36,233,376              | 2.32                              | no       |
| 03-031 | 22,677,427     | 13,686,139                              | 7,078,106               | 60.35                             | yes      |
| 03-037 | 25,984,157     | 18,574,199                              | 5,313,743               | 71.48                             | yes      |
| 03-051 | 27,872,854     | 367,849                                 | 25,725,922              | 1.32                              | no       |
| 03-059 | 23,166,613     | 19,020,322                              | 2,098,601               | 82.10                             | yes      |
| 03-060 | 22,842,008     | 18,788,367                              | 2,057,835               | 82.25                             | yes      |
| 03-075 | 17,905,072     | 13,229,748                              | 2,900,006               | 73.89                             | yes      |
| 03-108 | 38,637,117     | 13,134                                  | 34,668,977              | 0.03                              | no       |
| 03-110 | 25,517,266     | 15,103,898                              | 8,062,731               | 59.19                             | yes      |
| 03-113 | 23,284,009     | 4,198,073                               | 16,458,818              | 18.03                             | yes      |
| 03-127 | 41,860,202     | 611,208                                 | 36,757,232              | 1.46                              | no       |
| 03-134 | 28,279,149     | 106,671                                 | 26,422,856              | 0.38                              | no       |
| 03-137 | 36,010,543     | 27,498,890                              | 4,726,525               | 76.36                             | yes      |
| 03-140 | 19,892,897     | 16,525,296                              | 1,709,248               | 83.07                             | yes      |
| 03-141 | 18,449,529     | 15,826,946                              | 827,848                 | 85.78                             | yes      |
| 03-145 | 19,143,568     | 15,935,664                              | 1,057,201               | 83.24                             | yes      |
| 03-153 | 18,790,453     | 11,106,406                              | 5,732,515               | 59.10                             | yes      |
| 03-160 | 19,916,399     | 9,969,847                               | 7,765,547               | 50.06                             | yes      |

## Supplemental data 4: Antibodies anti-*P. falciparum* measurement

- Quantification of total antibodies against *P. falciparum* iE with indirect fluorescence

| sample | clinical group | Antibody titer | immunological statut |
|--------|----------------|----------------|----------------------|
| 01-004 | CM             | 4096           | strongly positive    |
| 01-006 | CM             | 4096           | strongly positive    |
| 01-013 | CM             | 1024           | strongly positive    |
| 01-020 | CM             | 256            | positive             |
| 02-002 | CM             | 4096           | strongly positive    |
| 02-003 | CM             | 256            | positive             |
| 02-011 | CM             | 4096           | strongly positive    |
| 02-013 | CM             | 1024           | strongly positive    |
| 02-016 | CM             | 1024           | strongly positive    |
| 02-017 | CM             | 256            | positive             |
| 02-018 | CM             | 1024           | strongly positive    |
| 02-025 | CM             | 1024           | strongly positive    |
| 02-027 | CM             | 1024           | strongly positive    |
| 02-030 | CM             | 256            | positive             |
| 02-034 | CM             | 4096           | strongly positive    |
| 03-022 | UM             | 1024           | strongly positive    |
| 03-025 | UM             | 4096           | strongly positive    |
| 03-031 | UM             | 4096           | strongly positive    |
| 03-037 | UM             | 4096           | strongly positive    |
| 03-039 | UM             | 256            | positive             |
| 03-060 | UM             | 1024           | strongly positive    |
| 03-075 | UM             | 1024           | strongly positive    |
| 03-110 | UM             | 1024           | strongly positive    |
| 03-113 | UM             | 256            | positive             |
| 03-137 | UM             | 64             | positive             |
| 03-140 | UM             | 256            | positive             |
| 03-141 | UM             | 64             | positive             |
| 03-145 | UM             | 1024           | strongly positive    |
| 03-153 | UM             | 256            | positive             |
| 03-160 | UM             | 1024           | strongly positive    |

- **IgG anti-VSA detection and quantification by flow cytometry**

| sample | clinical group | MFI <sub>iE</sub> | MFI <sub>iE</sub> - MFI <sub>iE</sub> goat IgG | MFI <sub>uE</sub> - MFI <sub>uE</sub> goat IgG | MFI    |
|--------|----------------|-------------------|------------------------------------------------|------------------------------------------------|--------|
| 01-004 | CM             | 44257             | 42951.5                                        | 49897.5                                        | 0      |
| 01-006 | CM             | 12446             | 11140.5                                        | 25930.5                                        | 0      |
| 01-013 | CM             | 48585.5           | 47280                                          | 40976                                          | 6304   |
| 01-020 | CM             | 10500             | 9194.5                                         | 7486                                           | 1708.5 |
| 02-002 | CM             | 5685              | 4379.5                                         | 15815.5                                        | 0      |
| 02-003 | CM             | 1920              | 614.5                                          | 5314.5                                         | 0      |
| 02-011 | CM             | 4924              | 3618.5                                         | 4279                                           | 0      |
| 02-013 | CM             | 3434.5            | 2129                                           | 9978                                           | 0      |
| 02-016 | CM             | 2761              | 1455.5                                         | 8378.5                                         | 0      |
| 02-017 | CM             | 6384.5            | 5079                                           | 3349.5                                         | 1729   |
| 02-018 | CM             | 2951.5            | 1646                                           | 17533.5                                        | 0      |
| 02-025 | CM             | 3971.5            | 2666                                           | 33416.5                                        | 0      |
| 02-027 | CM             | 1534              | 228.5                                          | 2765.5                                         | 0      |
| 02-030 | CM             | 11035.5           | 9730                                           | 33893.5                                        | 0      |
| 02-034 | CM             | 5064              | 3758.5                                         | 25153                                          | 0      |
| 03-022 | UM             | 1117              | 0                                              | 0                                              | 0      |
| 03-025 | UM             | 5066              | 3760.5                                         | 8818.5                                         | 0      |
| 03-031 | UM             | 10099             | 8793.5                                         | 96893.5                                        | 0      |
| 03-037 | UM             | 2136              | 830.5                                          | 0                                              | 831    |
| 03-059 | UM             | 8330              | 7024.5                                         | 26066                                          | 0      |
| 03-060 | UM             | 1837              | 531.5                                          | 0                                              | 532    |
| 03-075 | UM             | 5570.5            | 4265                                           | 3927.5                                         | 337    |
| 03-110 | UM             | 5115              | 3809.5                                         | 36784                                          | 0      |
| 03-113 | UM             | 8329              | 7023.5                                         | 9047                                           | 0      |
| 03-137 | UM             | 2766.5            | 1461                                           | 0                                              | 1461   |
| 03-140 | UM             | 4381.5            | 3076                                           | 2238                                           | 838    |
| 03-141 | UM             | 1121              | 0                                              | 0                                              | 0      |
| 03-145 | UM             | 4230.5            | 2925                                           | 24                                             | 2901   |
| 03-153 | UM             | 5599              | 4293.5                                         | 12894.5                                        | 0      |
| 03-160 | UM             | 6506              | 5200.5                                         | 0                                              | 5201   |

MFI<sub>iE</sub>: patient plasma on iE

MFI<sub>uE</sub>: patient plasma on uninfected erythrocyte (uE)

MFI<sub>iE</sub> goat IgG: goat IgG anti-human on iE

MFI<sub>uE</sub> goat IgG: goat IgG anti-human on uE

## Supplemental data 5: Parasites developmental blood stages

- CM samples: microscopy

| Stage<br>(hpi) | Early ring<br>(0-16) | Late ring<br>+ Early trophozoite<br>(16-30) | Late<br>Trophozoite<br>(30-38) | Schizont<br>38-48 | Gametocyte |
|----------------|----------------------|---------------------------------------------|--------------------------------|-------------------|------------|
| 01-004         | Not readable         |                                             |                                |                   |            |
| 01-006         | Not readable         |                                             |                                |                   |            |
| 01-013         | Not readable         |                                             |                                |                   |            |
| 01-020         | 0.91                 | 0.09                                        | 0                              | 0                 | 0          |
| 02-002         | 1                    | 0                                           | 0                              | 0                 | 0          |
| 02-003         | 0.93                 | 0.07                                        | 0                              | 0                 | 0          |
| 02-011         | 1                    | 0                                           | 0                              | 0                 | 0          |
| 02-013         | 0.93                 | 0.07                                        | 0                              | 0                 | 0          |
| 02-016         | Not readable         |                                             |                                |                   |            |
| 02-017         | 1                    | 0                                           | 0                              | 0                 | 0          |
| 02-018         | 0.94                 | 0.06                                        | 0                              | 0                 | 0          |
| 02-025         | 0.96                 | 0.04                                        | 0                              | 0                 | 0          |
| 02-027         | 0.98                 | 0.02                                        | 0                              | 0                 | 0          |
| 02-030         | 0.55                 | 0.45                                        | 0                              | 0                 | 0          |
| 02-034         | 1                    | 0                                           | 0                              | 0                 | 0          |

- CM samples: computed

| Stage<br>(hpi) | Ring<br>(8) | Early<br>trophozoite<br>(19) | Late trophozoite<br>(30) | Schizont<br>(42) | Gametocyte |
|----------------|-------------|------------------------------|--------------------------|------------------|------------|
| 01-004         | 0.63        | 0.37                         | 0                        | 0                | 0          |
| 01-006         | 0.91        | 0.09                         | 0                        | 0                | 0          |
| 01-013         | 0.94        | 0.06                         | 0                        | 0                | 0          |
| 01-020         | 1           | 0                            | 0                        | 0                | 0          |
| 02-002         | 1           | 0                            | 0                        | 0                | 0          |
| 02-003         | 1           | 0                            | 0                        | 0                | 0          |
| 02-011         | 1           | 0                            | 0                        | 0                | 0          |
| 02-013         | 1           | 0                            | 0                        | 0                | 0          |
| 02-016         | 1           | 0                            | 0                        | 0                | 0          |
| 02-017         | 1           | 0                            | 0                        | 0                | 0          |
| 02-018         | 1           | 0                            | 0                        | 0                | 0          |
| 02-025         | 1           | 0                            | 0                        | 0                | 0          |
| 02-027         | 0.86        | 0.14                         | 0                        | 0                | 0          |
| 02-030         | 0.56        | 0.41                         | 0.03                     | 0                | 0          |
| 02-034         | 1           | 0                            | 0                        | 0                | 0          |



- **UM samples: microscopy**

| Stage<br>(hpi) | Early ring<br>(0-16) | Late ring<br>+ Early trophozoite<br>(16-30) | Late<br>Trophozoite<br>(30-38) | Schizont<br>38-48 | Gametocyte |
|----------------|----------------------|---------------------------------------------|--------------------------------|-------------------|------------|
| 03-022         | 0.99                 | 0.01                                        | 0                              | 0                 | 0          |
| 03-025         | -                    | 1                                           | 0                              | 0                 | 0          |
| 03-031         | 0.01                 | 0.99                                        | 0                              | 0                 | 0          |
| 03-037         | 0.21                 | 0.79                                        | 0                              | 0                 | 0          |
| 03-059         | 0.01                 | 0.99                                        | 0                              | 0                 | 0          |
| 03-060         | 0.44                 | 0.56                                        | 0                              | 0                 | 0          |
| 03-075         | 0.06                 | 0.94                                        | 0                              | 0                 | 0          |
| 03-110         | 0.86                 | 0.14                                        | 0                              | 0                 | 0          |
| 03-113         | Not readable         |                                             |                                |                   |            |
| 03-137         | 0.03                 | 0.97                                        | 0                              | 0                 | 0          |
| 03-140         | -                    | 1                                           | 0                              | 0                 | 0          |
| 03-141         | 0.06                 | 0.94                                        | 0                              | 0                 | 0          |
| 03-145         | 0.14                 | 0.86                                        | 0                              | 0                 | 0          |
| 03-153         | 0.29                 | 0.71                                        | 0                              | 0                 | 0          |
| 03-160         | 0.79                 | 0.21                                        | 0                              | 0                 | 0          |

- **UM samples: computed**

| Stage<br>(hpi) | Ring<br>(8) | Early<br>trophozoite<br>(19) | Late trophozoite<br>(30) | Schizont<br>(42) | Gametocyte |
|----------------|-------------|------------------------------|--------------------------|------------------|------------|
| 03-022         | 1           | 0                            | 0                        | 0                | 0          |
| 03-025         | 0.24        | 0.73                         | 0                        | 0                | 0.03       |
| 03-031         | 0.11        | 0.77                         | 0.02                     | 0                | 0.1        |
| 03-037         | 0.37        | 0.58                         | 0                        | 0                | 0.05       |
| 03-059         | 0.10        | 0.86                         | 0                        | 0                | 0.04       |
| 03-060         | 0.77        | 0.23                         | 0                        | 0                | 0          |
| 03-075         | 0.13        | 0.83                         | 0                        | 0                | 0.04       |
| 03-110         | 0.71        | 0.29                         | 0                        | 0                | 0          |
| 03-113         | 1           | 0                            | 0                        | 0                | 0          |
| 03-137         | 0.58        | 0.42                         | 0                        | 0                | 0          |
| 03-140         | 0.59        | 0.41                         | 0                        | 0                | 0          |
| 03-141         | 0.59        | 0.41                         | 0                        | 0                | 0          |
| 03-145         | 0.63        | 0.37                         | 0                        | 0                | 0          |
| 03-153         | 0.71        | 0.29                         | 0                        | 0                | 0          |
| 03-160         | 0.82        | 0.18                         | 0                        | 0                | 0          |

## Supplemental data 6: RT-qPCR validations

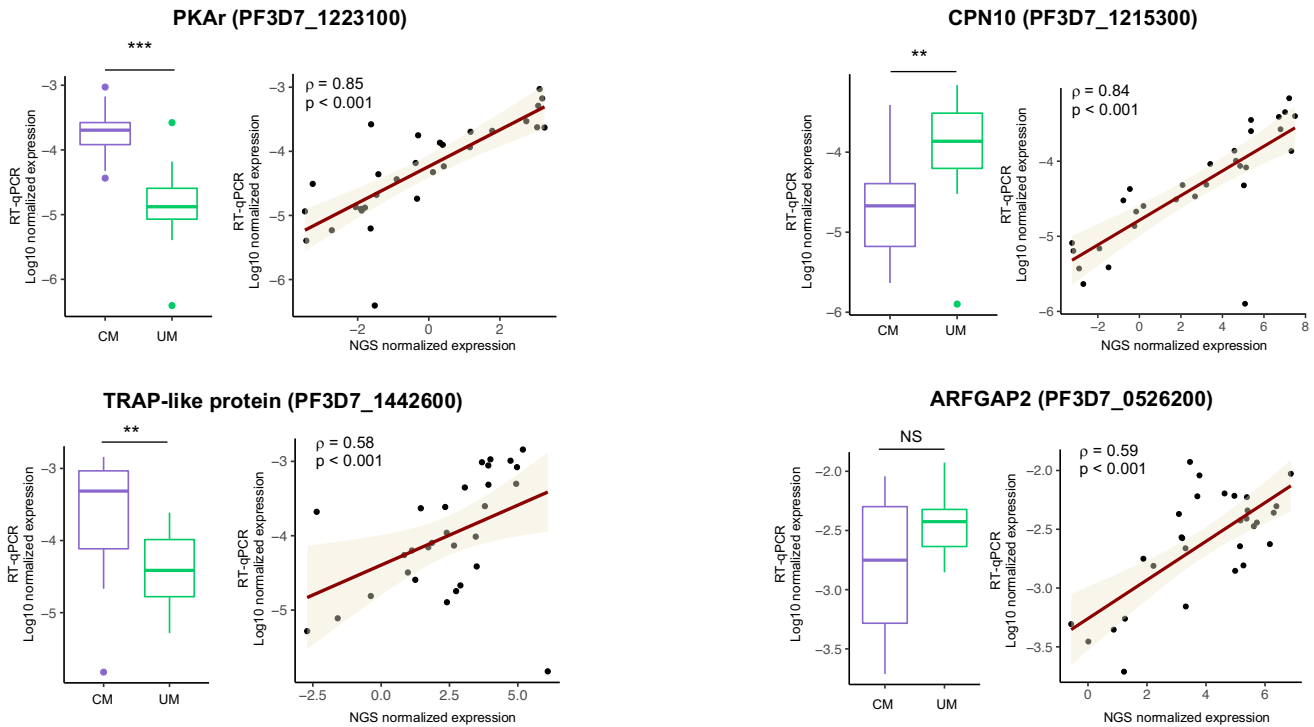

| Gene                              | CM                                                                | UM                                                                | p-value |
|-----------------------------------|-------------------------------------------------------------------|-------------------------------------------------------------------|---------|
|                                   | Median [10th-90th percentile]                                     | Median [10th-90th percentile]                                     |         |
| PHISTa - PF3D7_1372000            | $1.1 \cdot 10^{-4}$ [ $3.6 \cdot 10^{-5}$ - $5.9 \cdot 10^{-4}$ ] | $3.0 \cdot 10^{-4}$ [ $2.0 \cdot 10^{-4}$ - $6.1 \cdot 10^{-4}$ ] | < 0.001 |
| PKAr - PF3D7_1223100              | $2.0 \cdot 10^{-4}$ [ $5.2 \cdot 10^{-5}$ - $6.1 \cdot 10^{-4}$ ] | $1.3 \cdot 10^{-5}$ [ $4.8 \cdot 10^{-6}$ - $5.7 \cdot 10^{-5}$ ] | < 0.001 |
| CLAG9 - PF3D7_0935800             | $5.5 \cdot 10^{-4}$ [ $1.6 \cdot 10^{-4}$ - $1.5 \cdot 10^{-3}$ ] | $9.3 \cdot 10^{-5}$ [ $3.1 \cdot 10^{-5}$ - $1.1 \cdot 10^{-3}$ ] | 0.02    |
| TRAP-like protein - PF3D7_1442600 | $4.9 \cdot 10^{-4}$ [ $3.8 \cdot 10^{-5}$ - $1.0 \cdot 10^{-3}$ ] | $3.9 \cdot 10^{-5}$ [ $9.8 \cdot 10^{-6}$ - $2.2 \cdot 10^{-4}$ ] | 0.002   |
| HSP60 - PF3D7_1015600             | $1.6 \cdot 10^{-3}$ [ $5.3 \cdot 10^{-4}$ - $2.1 \cdot 10^{-2}$ ] | $2.7 \cdot 10^{-4}$ [ $9.6 \cdot 10^{-5}$ - $6.3 \cdot 10^{-4}$ ] | < 0.001 |
| CPN10 - PF3D7_1215300             | $2.1 \cdot 10^{-5}$ [ $3.8 \cdot 10^{-6}$ - $7.5 \cdot 10^{-5}$ ] | $1.4 \cdot 10^{-4}$ [ $3.5 \cdot 10^{-5}$ - $4.3 \cdot 10^{-4}$ ] | 0.002   |
| Ppase - PF3D7_0316300             | $3.9 \cdot 10^{-5}$ [ $1.4 \cdot 10^{-5}$ - $2.8 \cdot 10^{-4}$ ] | $9.6 \cdot 10^{-4}$ [ $1.8 \cdot 10^{-4}$ - $1.8 \cdot 10^{-3}$ ] | < 0.001 |
| ARFGAP2 - PF3D7_0526200           | $1.8 \cdot 10^{-3}$ [ $3.9 \cdot 10^{-4}$ - $6.1 \cdot 10^{-3}$ ] | $3.8 \cdot 10^{-3}$ [ $1.8 \cdot 10^{-3}$ - $8.2 \cdot 10^{-3}$ ] | 0.09    |

## Supplemental data 7: GSEA – GO biological process and KEGG pathways

- GO biological process

| <b>GO:0051276</b> |  | <b>chromosome organization</b>                                   |
|-------------------|--|------------------------------------------------------------------|
| PF3D7_0610400     |  | histone H3                                                       |
| PF3D7_0617800     |  | histone H2A                                                      |
| PF3D7_0617900     |  | histone H3 variant                                               |
| PF3D7_0509100     |  | structural maintenance of chromosomes protein 4, putative        |
| PF3D7_0414000     |  | structural maintenance of chromosomes protein 3                  |
| PF3D7_1318400     |  | structural maintenance of chromosomes protein 2, putative        |
| <b>GO:1902600</b> |  | <b>proton transmembrane transport</b>                            |
| PF3D7_1456800     |  | V-type H(+)-translocating pyrophosphatase, putative              |
| PF3D7_1323200     |  | V-type proton ATPase subunit G, putative                         |
| PF3D7_0217100     |  | ATP synthase subunit alpha, mitochondrial                        |
| PF3D7_1235200     |  | V-type K+-independent H+-translocating inorganic pyrophosphatase |
| PF3D7_1235700     |  | ATP synthase subunit beta, mitochondrial                         |
| <b>GO:0006412</b> |  | <b>translation</b>                                               |
| PF3D7_1223900     |  | 50S ribosomal protein L24, putative                              |
| PF3D7_1442800     |  | conserved Plasmodium protein, unknown function                   |
| PF3D7_1144000     |  | 40S ribosomal protein S21                                        |
| PF3D7_1414300     |  | 60S ribosomal protein L10, putative                              |
| PF3D7_0611700     |  | 60S ribosomal protein L39                                        |
| PF3D7_1144300     |  | 60S ribosomal protein L41                                        |
| PF3D7_0710600     |  | 60S ribosomal protein L34                                        |
| PF3D7_1351400     |  | 60S ribosomal protein L17, putative                              |
| PF3D7_1461300     |  | 40S ribosomal protein S28e, putative                             |
| PF3D7_0317600     |  | 40S ribosomal protein S11, putative                              |
| PF3D7_1317800     |  | 40S ribosomal protein S19                                        |
| PF3D7_0316800     |  | 40S ribosomal protein S15A, putative                             |
| PF3D7_1308300     |  | 40S ribosomal protein S27                                        |
| PF3D7_1408600     |  | 40S ribosomal protein S8e, putative                              |
| PF3D7_1431700     |  | 60S ribosomal protein L14, putative                              |
| PF3D7_0415900     |  | 60S ribosomal protein L15, putative                              |
| PF3D7_0212200     |  | ribosomal protein L12, mitochondrial, putative                   |
| PF3D7_0706400     |  | 60S ribosomal protein L37                                        |
| PF3D7_0312800     |  | 60S ribosomal protein L26, putative                              |
| PF3D7_0304400     |  | 60S ribosomal protein L44                                        |
| PF3D7_1124900     |  | 60S ribosomal protein L35, putative                              |
| PF3D7_1331800     |  | 60S ribosomal protein L23, putative                              |
| PF3D7_0814000     |  | 60S ribosomal protein L13-2, putative                            |
| PF3D7_1242700     |  | 40S ribosomal protein S17, putative                              |
| PF3D7_0422400     |  | 40S ribosomal protein S19                                        |
| PF3D7_0306900     |  | 40S ribosomal protein S23, putative                              |
| PF3D7_1003500     |  | 40S ribosomal protein S20e, putative                             |
| PF3D7_1105400     |  | 40S ribosomal protein S4, putative                               |
| PF3D7_0307200     |  | 60S ribosomal protein L7, putative                               |

|                   |                                                            |
|-------------------|------------------------------------------------------------|
| PF3D7_0317100     | 6-cysteine protein                                         |
| PF3D7_0610000     | ribosomal protein L19, mitochondrial, putative             |
| PF3D7_0822000     | ribosomal protein L4, mitochondrial, putative              |
| <b>GO:0006270</b> | <b>DNA replication initiation</b>                          |
| PF3D7_1425900     | conserved Plasmodium protein, unknown function             |
| PF3D7_1355100     | DNA replication licensing factor MCM6                      |
| PF3D7_1211700     | DNA replication licensing factor MCM5, putative            |
| PF3D7_1317100     | DNA replication licensing factor MCM4                      |
| PF3D7_1417800     | DNA replication licensing factor MCM2                      |
| <b>GO:0006260</b> | <b>DNA replication</b>                                     |
| PF3D7_1425900     | conserved Plasmodium protein, unknown function             |
| PF3D7_1355100     | DNA replication licensing factor MCM6                      |
| PF3D7_1463200     | replication factor C subunit 3, putative                   |
| PF3D7_1334100     | conserved protein, unknown function                        |
| PF3D7_1111100     | replication factor C subunit 5, putative                   |
| PF3D7_0411900     | DNA polymerase alpha catalytic subunit A                   |
| PF3D7_1211700     | DNA replication licensing factor MCM5, putative            |
| PF3D7_1317100     | DNA replication licensing factor MCM4                      |
| PF3D7_1015800     | ribonucleoside-diphosphate reductase small chain, putative |
| <b>GO:0006414</b> | <b>translational elongation</b>                            |
| PF3D7_1442800     | conserved Plasmodium protein, unknown function             |
| PF3D7_0309600     | 60S acidic ribosomal protein P2                            |
| PF3D7_1235400     | tetQ family GTPase, putative                               |
| PF3D7_0110100     | selenocysteine-specific elongation factor, putative        |
| PF3D7_1330600     | elongation factor Tu, putative                             |
| <b>GO:0007018</b> | <b>microtubule-based movement</b>                          |
| PF3D7_1020300     | cytoplasmic dynein intermediate chain, putative            |
| PF3D7_1122900     | dynein heavy chain, putative                               |
| PF3D7_1211000     | kinesin-X3, putative                                       |
| PF3D7_0319400     | kinesin-8X                                                 |
| PF3D7_1426300     | dynein intermediate chain, putative                        |
| PF3D7_0729900     | dynein heavy chain, putative                               |
| <b>GO:0006352</b> | <b>DNA-templated transcription, initiation</b>             |
| PF3D7_1404000     | DNA-directed RNA polymerase II subunit RPB4, putative      |
| PF3D7_0621000     | conserved Plasmodium protein, unknown function             |
| PF3D7_0506200     | TATA-box-binding protein                                   |
| <b>GO:0006333</b> | <b>chromatin assembly or disassembly</b>                   |
| PF3D7_0610400     | histone H3                                                 |
| PF3D7_0320900     | histone H2A.Z                                              |
| PF3D7_1220900     | heterochromatin protein 1                                  |
| <b>GO:0044409</b> | <b>entry into host</b>                                     |
| PF3D7_0404400     | 6-cysteine protein P36                                     |
| PF3D7_0309600     | 60S acidic ribosomal protein P2                            |
| PF3D7_1133400     | apical membrane antigen 1                                  |
| PF3D7_1136700     | armadillo-interacting protein AIP                          |

|                   |                                                          |
|-------------------|----------------------------------------------------------|
| PF3D7_1458000     | cysteine proteinase falcipain 1                          |
| PF3D7_0731500     | erythrocyte binding antigen-175                          |
| PF3D7_0102500     | erythrocyte binding antigen-181                          |
| PF3D7_1147800     | membrane associated erythrocyte binding-like protein     |
| PF3D7_1430200     | plasmepsin IX                                            |
| PF3D7_0808200     | plasmepsin X                                             |
| PF3D7_1335400     | reticulocyte binding protein 2 homologue a               |
| PF3D7_0424200     | reticulocyte binding protein homologue 4                 |
| PF3D7_1116000     | rhoptry neck protein 4                                   |
| PF3D7_0501600     | rhoptry-associated protein 2                             |
| <b>GO:0048193</b> | <b>Golgi vesicle transport</b>                           |
| PF3D7_1437800     | trafficking protein particle complex subunit 5, putative |
| PF3D7_0418500     | trafficking protein particle complex subunit 3, putative |
| <b>GO:0019752</b> | <b>carboxylic acid metabolic process</b>                 |
| PF3D7_1325200     | lactate dehydrogenase, putative                          |
| PF3D7_0618500     | malate dehydrogenase                                     |
| <b>GO:0009657</b> | <b>plastid organization</b>                              |
| PF3D7_1239700     | ATP-dependent zinc metalloprotease FTSH 1                |
| PF3D7_1408700     | conserved protein, unknown function                      |
| PF3D7_0913500     | protease, putative                                       |
| PF3D7_1417800     | DNA replication licensing factor MCM2                    |

- **KEGG pathways**

|                |                                                                                             |
|----------------|---------------------------------------------------------------------------------------------|
| <b>ec00010</b> | <b>Glycolysis / Gluconeogenesis</b>                                                         |
| PF3D7_0303700  | lipoamide acyltransferase component of branched-chain alpha-keto acid dehydrogenase complex |
| PF3D7_1342800  | malate dehydrogenase                                                                        |
| PF3D7_0922500  | ATP-dependent 6-phosphofructokinase                                                         |
| PF3D7_0915400  | phosphoglycerate kinase                                                                     |
| PF3D7_1325200  | lactate dehydrogenase, putative                                                             |
| PF3D7_1446400  | phosphoenolpyruvate carboxykinase                                                           |
| PF3D7_0618500  | pyruvate dehydrogenase E1 component subunit beta                                            |
| <b>ec00750</b> | <b>Vitamin B6 metabolism</b>                                                                |
| PF3D7_0616000  | pyridoxal kinase                                                                            |
| PF3D7_1459700  | pyridoxal 5'-phosphate synthase, putative                                                   |
| <b>ec00620</b> | <b>Pyruvate metabolism</b>                                                                  |
| PF3D7_0303700  | lipoamide acyltransferase component of branched-chain alpha-keto acid dehydrogenase complex |
| PF3D7_0618500  | malate dehydrogenase                                                                        |
| PF3D7_1325200  | lactate dehydrogenase, putative                                                             |
| PF3D7_1342800  | phosphoenolpyruvate carboxykinase                                                           |
| PF3D7_1446400  | pyruvate dehydrogenase E1 component subunit beta                                            |
| PF3D7_1450900  | acetyl-CoA acetyltransferase, putative                                                      |

## Supplemental data 8: MCode clusters from PPI network

| Cluster 1     |                                                  |
|---------------|--------------------------------------------------|
| PF3D7_0304400 | 60S ribosomal protein L44                        |
| PF3D7_0306900 | 40S ribosomal protein S23, putative              |
| PF3D7_0307200 | 60S ribosomal protein L7, putative               |
| PF3D7_0309600 | 60S acidic ribosomal protein P2                  |
| PF3D7_0312800 | 60S ribosomal protein L26, putative              |
| PF3D7_0316800 | 40S ribosomal protein S15A, putative             |
| PF3D7_0317600 | 40S ribosomal protein S11, putative              |
| PF3D7_0415900 | 60S ribosomal protein L15, putative              |
| PF3D7_0422400 | 40S ribosomal protein S19                        |
| PF3D7_0611700 | 60S ribosomal protein L39                        |
| PF3D7_0706400 | 60S ribosomal protein L37                        |
| PF3D7_0710600 | 60S ribosomal protein L34                        |
| PF3D7_0814000 | 60S ribosomal protein L13-2, putative            |
| PF3D7_1003500 | 40S ribosomal protein S20e, putative             |
| PF3D7_1105400 | 40S ribosomal protein S4, putative               |
| PF3D7_1124900 | 60S ribosomal protein L35, putative              |
| PF3D7_1144000 | 40S ribosomal protein S21                        |
| PF3D7_1242700 | 40S ribosomal protein S17, putative              |
| PF3D7_1308300 | 40S ribosomal protein S27                        |
| PF3D7_1317800 | 40S ribosomal protein S19                        |
| PF3D7_1331800 | 60S ribosomal protein L23, putative              |
| PF3D7_1351400 | 60S ribosomal protein L17, putative              |
| PF3D7_1408600 | 40S ribosomal protein S8e, putative              |
| PF3D7_1414300 | 60S ribosomal protein L10, putative              |
| PF3D7_1431700 | 60S ribosomal protein L14, putative              |
| PF3D7_1461300 | 40S ribosomal protein S28e, putative             |
| Cluster 2     |                                                  |
| PF3D7_0508000 | 6-cysteine protein                               |
| PF3D7_1133400 | apical membrane antigen 1                        |
| PF3D7_0611600 | basal complex transmembrane protein 1            |
| PF3D7_1223100 | cAMP-dependent protein kinase regulatory subunit |
| PF3D7_0621100 | conserved Plasmodium protein, unknown function   |
| PF3D7_1136200 | conserved Plasmodium protein, unknown function   |
| PF3D7_1206300 | conserved Plasmodium protein, unknown function   |
| PF3D7_1435600 | conserved Plasmodium protein, unknown function   |
| PF3D7_0723300 | conserved protein, unknown function              |
| PF3D7_0817600 | conserved protein, unknown function              |
| PF3D7_1320700 | conserved protein, unknown function              |
| PF3D7_0302500 | cytoadherence linked asexual protein 3.1         |
| PF3D7_0302200 | cytoadherence linked asexual protein 3.2         |
| PF3D7_0831600 | cytoadherence linked asexual protein 8           |
| PF3D7_1035300 | glutamate-rich protein GLURP                     |
| PF3D7_1345600 | inner membrane complex protein                   |

|                  |                                                                                            |
|------------------|--------------------------------------------------------------------------------------------|
| PF3D7_0613900    | myosin E, putative                                                                         |
| PF3D7_0822900    | PhIL1-interacting candidate PIC2                                                           |
| PF3D7_0508900    | protein AAP6                                                                               |
| PF3D7_1321100    | protein kinase domain-containing protein, putative                                         |
| PF3D7_0932100    | protein MAM3, putative                                                                     |
| PF3D7_0506900    | rhomboid protease ROM4                                                                     |
| PF3D7_1463900    | rhopty neck protein 11, putative                                                           |
| PF3D7_1452000    | rhopty neck protein 2                                                                      |
| PF3D7_0817700    | rhopty neck protein 5                                                                      |
| PF3D7_1410400    | rhopty-associated protein 1                                                                |
| PF3D7_0501600    | rhopty-associated protein 2                                                                |
| PF3D7_0207800    | serine repeat antigen 3                                                                    |
| PF3D7_1356800    | serine/threonine protein kinase ARK3, putative                                             |
| PF3D7_0704500    | serine/threonine protein kinase, putative                                                  |
| PF3D7_0508100    | SET domain protein, putative                                                               |
| PF3D7_1235200    | V-type K <sup>+</sup> -independent H <sup>+</sup> -translocating inorganic pyrophosphatase |
| <b>Cluster 3</b> |                                                                                            |
| PF3D7_0102500    | erythrocyte binding antigen-181                                                            |
| PF3D7_0203100    | protein kinase, putative                                                                   |
| PF3D7_0808200    | plasmepsin X                                                                               |
| PF3D7_1125800    | kelch domain-containing protein, putative                                                  |
| PF3D7_1252400    | reticulocyte binding protein homologue 3, pseudogene                                       |
| PF3D7_1332200    | conserved protein, unknown function                                                        |
| PF3D7_1335400    | reticulocyte binding protein 2 homologue a                                                 |
| <b>Cluster 4</b> |                                                                                            |
| PF3D7_0316300    | inorganic pyrophosphatase                                                                  |
| PF3D7_0319400    | kinesin-8X                                                                                 |
| PF3D7_0516800    | AP2 domain transcription factor AP2-O2, putative                                           |
| PF3D7_0707200    | conserved Plasmodium protein, unknown function                                             |
| PF3D7_0717600    | inner membrane complex protein, putative                                                   |
| PF3D7_0815500    | conserved Plasmodium protein, unknown function                                             |
| PF3D7_1133200    | conserved Plasmodium protein, unknown function                                             |
| PF3D7_1211700    | DNA replication licensing factor MCM5, putative                                            |
| PF3D7_1239200    | AP2 domain transcription factor, putative                                                  |
| PF3D7_1317100    | DNA replication licensing factor MCM4                                                      |
| PF3D7_1355100    | DNA replication licensing factor MCM6                                                      |
| PF3D7_1417800    | DNA replication licensing factor MCM2                                                      |

**Supplemental data 9: *var* genes expression measurement by RT-qPCR**

| <b>Primers set</b> | <b>CM</b><br>Median [10th-90th percentile] | <b>UM</b><br>Median [10th-90th percentile] | <b>p-value</b> |
|--------------------|--------------------------------------------|--------------------------------------------|----------------|
| ATS-1              | 0.004 [0.002-0.008]                        | 0.001 [0.0006-0.003]                       | <0.001         |
| ATS-2              | 0.02 [0.01-0.05]                           | 0.01 [0.008-0.02]                          | <0.001         |
| DBL $\alpha$       | 0.1 [0.02-0.9]                             | 0.05 [0.02-0.3]                            | 0.1            |
